# Supplementary material
Source: Springer Nature journal article supplement (https://www.springermedizin.de/resource/supplementary/12885_2012_3935_MOESM1_ESM.pdf/9464794)

a

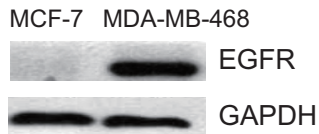

b

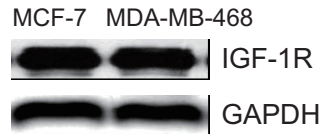

c AG1478

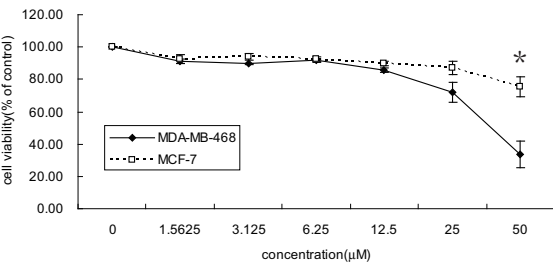

d AG1024

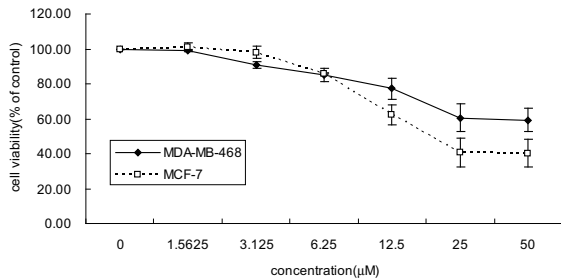

e

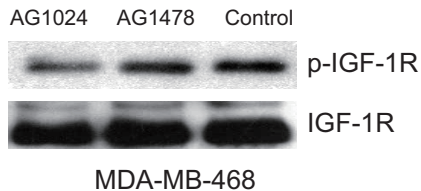

f

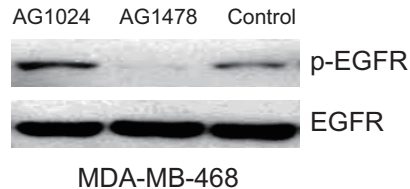

Supplement: MOESM1 [file 9464794]
